# Supplementary material for: Crowd vocal learning induces vocal dialects in bats: Playback of conspecifics shapes fundamental frequency usage by pups
Source: PubMed Central journal article supplement (PMC5663327; doi:10.1371/journal.pbio.2002556), 2017-10-31

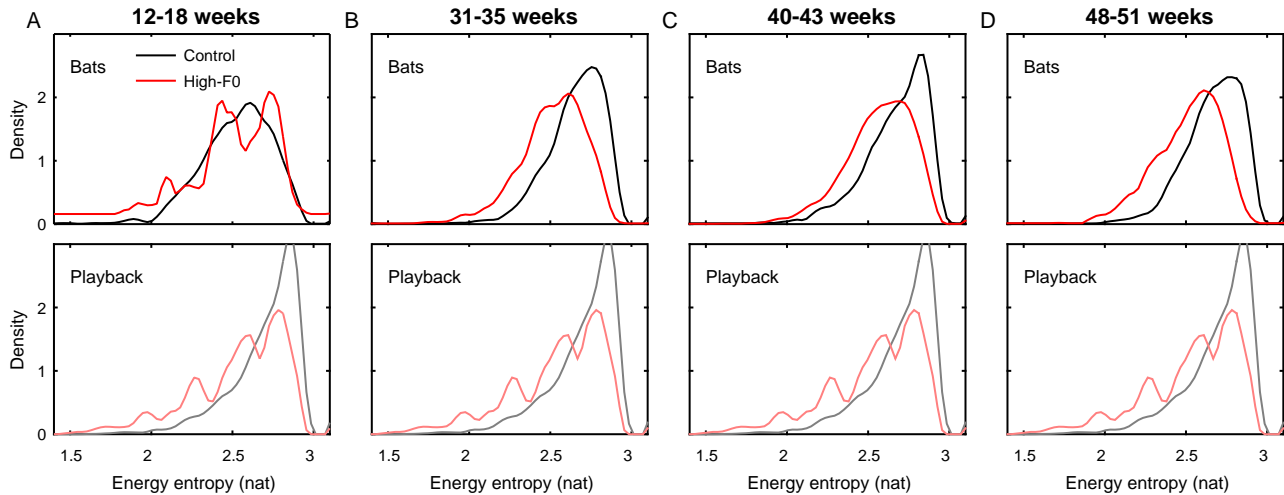

Supplement: pbio.2002556.s005.pdf [file pbio.2002556.s005.pdf]
