# Supplementary material for: Crowd vocal learning induces vocal dialects in bats: Playback of conspecifics shapes fundamental frequency usage by pups
Source: PubMed Central journal article supplement (PMC5663327; doi:10.1371/journal.pbio.2002556), 2017-10-31
Supplement: pbio.2002556.s006.pdf [file pbio.2002556.s006.pdf]

**S1 Table. Linear discriminant analysis of the playbacks.**

|                            | <b>Energy entropy</b> | <b>Peak frequency</b> | <b>F0</b>     | <b>Spectral centroid</b> | <b>Spectral entropy</b> | <b>Wiener entropy</b> | <b>Duration</b> |
|----------------------------|-----------------------|-----------------------|---------------|--------------------------|-------------------------|-----------------------|-----------------|
| Standardized Coefficients: |                       |                       |               |                          |                         |                       |                 |
| LD1                        | <b>-0.592</b>         | -0.001                | <b>-0.857</b> | <b>-0.296</b>            | 0.194                   | -0.244                | 0.160           |
| LD2                        | <b>-1.002</b>         | -0.026                | <b>0.798</b>  | <b>-0.517</b>            | 0.104                   | 0.414                 | 0.117           |
| Correlations:              |                       |                       |               |                          |                         |                       |                 |
| LD1                        | <b>-0.575</b>         | -0.233                | <b>-0.868</b> | <b>-0.418</b>            | -0.062                  | -0.170                | -0.254          |
| LD2                        | <b>-0.753</b>         | 0.072                 | <b>0.404</b>  | 0.107                    | -0.018                  | <b>0.179</b>          | -0.128          |

The standardized coefficients (i.e. feature's contribution to the discrimination in each discriminant function) and the correlation of each feature with the two linear discriminant (LD) functions. Top three are in bold. As expected by the selection of the playbacks the fundamental frequency (F0) has the major effect. The error rate in the playback discrimination was 26.4%.
