# Supplementary material for: Crowd vocal learning induces vocal dialects in bats: Playback of conspecifics shapes fundamental frequency usage by pups
Source: PubMed Central journal article supplement (PMC5663327; doi:10.1371/journal.pbio.2002556), 2017-10-31
Supplement: pbio.2002556.s007.pdf [file pbio.2002556.s007.pdf]

**S2 Table. Number of calls analyzed for each pup in each recording session.**

| <b>Experimental group</b> | <b>Pup symbol (in the figures)</b> | <b>Recording session 1</b> | <b>Recording session 2</b> | <b>Recording session 3</b> | <b>Recording session 4</b> |
|---------------------------|------------------------------------|----------------------------|----------------------------|----------------------------|----------------------------|
| <i>High-F0</i>            | Circle                             | 34                         | 278                        | 476                        | 209                        |
| <i>High-F0</i>            | Square                             | 15                         | 363                        | 702                        | 332                        |
| <i>High-F0</i>            | Pentagram                          | 8                          | 191                        | 721                        | 191                        |
| <i>High-F0</i>            | Diamond                            | 34                         | 275                        | 1421                       | 143                        |
| <i>Low-F0</i>             | Circle                             | 110                        | 737                        | 1359                       | 866                        |
| <i>Low-F0</i>             | Square                             | 300                        | 600                        | 1083                       | 643                        |
| <i>Low-F0</i>             | Pentagram                          | 124                        | 644                        | 1115                       | 607                        |
| <i>Low-F0</i>             | Diamond                            | 213                        | 297                        | 854                        | 500                        |
| <i>Low-F0</i>             | Triangle                           | 171                        | 589                        | 1084                       | 531                        |
| <i>Control</i>            | Circle                             | 318                        | 1390                       | 391                        | 1306                       |
| <i>Control</i>            | Square                             | 208                        | 502                        | 359                        | 285                        |
| <i>Control</i>            | Pentagram                          | 340                        | 648                        | 320                        | 478                        |
| <i>Control</i>            | Diamond                            | 149                        | 804                        | 322                        | 383                        |
| <i>Control</i>            | Triangle                           | 151                        | 384                        | 102                        | 226                        |
