# Supplementary material for: Crowd vocal learning induces vocal dialects in bats: Playback of conspecifics shapes fundamental frequency usage by pups
Source: PubMed Central journal article supplement (PMC5663327; doi:10.1371/journal.pbio.2002556), 2017-10-31
Supplement: pbio.2002556.s008.pdf [file pbio.2002556.s008.pdf]

**S3 Table. Linear mixed models for the usage of Low-F0 and High-F0 calls.**

**Tests of Fixed Effects (Proportion of Low-F0 calls):**

| Source           | Numerator df | Denominator df | F         | Sig.            |
|------------------|--------------|----------------|-----------|-----------------|
| <b>Intercept</b> | 1            | 51             | 79.270948 | 0.000           |
| <b>Group</b>     | 2            | 51             | 9.076     | <b>0.000425</b> |
| <b>Sex</b>       | 1            | 51             | .203      | .654            |
| <b>Age</b>       | 1            | 51             | 11.120    | <b>0.001597</b> |

**Post-hoc pairwise comparisons (Proportion of Low-F0 calls):**

| Group/Sex 1          | Group/Sex 2          | Mean Difference | Std. Error | df | Sig.          | 95% Confidence Interval |             |
|----------------------|----------------------|-----------------|------------|----|---------------|-------------------------|-------------|
|                      |                      |                 |            |    |               | Lower Bound             | Upper Bound |
| <b>Low-F0 group</b>  | <b>Control group</b> | .100            | .023       | 51 | <b>0.0003</b> | .042                    | .158        |
| <b>High-F0 group</b> | <b>Control group</b> | .035            | .023       | 51 | .410          | -.023                   | .094        |
| <b>Low-F0 group</b>  | <b>High-F0 group</b> | .064            | .026       | 51 | <b>.049</b>   | .000                    | .129        |
| <b>Female</b>        | <b>Male</b>          | .009            | .021       | 51 | .654          | -.033                   | .051        |

**Tests of Fixed Effects (Proportion of High-F0 calls):**

| Source           | Numerator df | Denominator df | F      | Sig.            |
|------------------|--------------|----------------|--------|-----------------|
| <b>Intercept</b> | 1            | 49             | 83.982 | .000            |
| <b>Group</b>     | 2            | 49             | 8.274  | <b>0.000802</b> |
| <b>Sex</b>       | 1            | 49             | .719   | .400            |
| <b>Age</b>       | 1            | 49             | 40.034 | <b>.000</b>     |
| <b>Age*Group</b> | 2            | 49             | 4.706  | <b>.014</b>     |

**Post-hoc pairwise comparisons (Proportion of High-F0 calls):**

| Group/Sex 1          | Group/Sex 2          | Mean Difference | Std. Error | df | Sig.        | 95% Confidence Interval |             |
|----------------------|----------------------|-----------------|------------|----|-------------|-------------------------|-------------|
|                      |                      |                 |            |    |             | Lower Bound             | Upper Bound |
| <b>Low-F0 group</b>  | <b>Control group</b> | .009            | .021       | 51 | 1.000       | -.043                   | .061        |
| <b>High-F0 group</b> | <b>Control group</b> | .063            | .021       | 51 | <b>.012</b> | .011                    | .115        |
| <b>Low-F0 group</b>  | <b>High-F0 group</b> | -.054           | .023       | 51 | .068        | -.111                   | .003        |
| <b>Female</b>        | <b>Male</b>          | -.015           | .019       | 51 | .432        | -.052                   | .023        |

Two models are presented (one for Low-F0 and one for High-F0 calls). The models included the age of the pups (four time points, i.e. recording sessions), the sex of the pups, and the group (i.e. Control, *Low-F0* group, or *High-F0* group). The second table of each test contains post-hoc pairwise comparisons of estimated marginal means (Bonferroni-adjusted for multiple comparisons). The P-values of factors that significantly influenced the calls are marked in bold. Insignificant interactions were removed and the models were recomputed. Analysis conducted in SPSS.
