# Supplementary material for: Crowd vocal learning induces vocal dialects in bats: Playback of conspecifics shapes fundamental frequency usage by pups
Source: PubMed Central journal article supplement (PMC5663327; doi:10.1371/journal.pbio.2002556), 2017-10-31
Supplement: pbio.2002556.s009.pdf [file pbio.2002556.s009.pdf]

**S4 Table. Similarity between males and females in F0 usage, and no correlation between body-weight and F0 usage.**

| Rec. session | Sex differences (Mann-Whitney-U) in: |                    |                      | Weight correlation (Spearman) with: |                    |                      | Weight differences between groups (Kruskal-Wallis) |
|--------------|--------------------------------------|--------------------|----------------------|-------------------------------------|--------------------|----------------------|----------------------------------------------------|
|              | Proportion of High-F0                | Mean F0            | Proportion of Low-F0 | Proportion of High-F0               | Mean F0            | Proportion of Low-F0 |                                                    |
|              | <i>p-value (U)</i>                   | <i>p-value (U)</i> | <i>p-value (U)</i>   | <i>p-value (ρ)</i>                  | <i>p-value (ρ)</i> | <i>p-value (ρ)</i>   | <i>p-value (H)</i>                                 |
| 1            | 0.40 (46)                            | 0.90 (51)          | 0.26 (43)            | 0.98 (-0.01)                        | 0.44 (-0.23)       | 0.26 (-0.32)         | 0.39 (1.87)                                        |
| 2            | 0.80 (50)                            | 0.53 (58)          | 0.71 (56)            | 0.90 (-0.04)                        | 0.80 (-0.08)       | 0.53 (-0.18)         | 0.37 (2.01)                                        |
| 3            | 0.32 (44)                            | 0.45 (59)          | 0.21 (63)            | 0.99 (0.01)                         | 0.69 (-0.12)       | 0.11 (-0.45)         | 0.29 (2.44)                                        |
| 4            | 1.00 (52)                            | 0.80 (55)          | 0.07 (67)            | 0.60 (0.15)                         | 0.58 (-0.16)       | 0.52 (-0.19)         | 0.27 (2.63)                                        |

For each recording session, p-values (with statistic) are depicted for Mann-Whitney-U test for differences between the sexes in high-F0 content, mean F0 production, and low-F0 content. For each recording session, p-values (with statistic) are depicted for Spearman correlation tests for correlations between body weight and high-F0 content, mean F0 production, and low-F0 content. All tests indicated insignificant relations. For each recording session, p-values (with statistic) for body-weight differences between the three experimental groups (Kruskal-Wallis test) show that there was no significant weight difference between the groups.
