# Supplementary material for: Crowd vocal learning induces vocal dialects in bats: Playback of conspecifics shapes fundamental frequency usage by pups
Source: PubMed Central journal article supplement (PMC5663327; doi:10.1371/journal.pbio.2002556), 2017-10-31
Supplement: pbio.2002556.s010.pdf [file pbio.2002556.s010.pdf]

**S5 Table. Recording Schedule.**

| Recording session | Experimental Group | Recording start | Recording end  |
|-------------------|--------------------|-----------------|----------------|
| 1                 | Control*           | 21.12.15 12:45  | 22.12.15 12:50 |
|                   | Low-F0*            | 22.12.15 12:50  | 23.12.15 12:41 |
|                   | Control*           | 23.12.15 12:41  | 24.12.15 12:00 |
|                   | High-F0*           | 27.12.15 12:50  | 28.12.15 12:45 |
|                   | Low-F0*            | 28.12.15 12:45  | 29.12.15 13:04 |
|                   | Control*           | 29.12.15 13:04  | 30.12.15 13:43 |
|                   | High-F0*           | 30.12.15 13:43  | 31.12.15 14:00 |
|                   | Low-F0*            | 03.01.16 14:34  | 04.01.16 14:32 |
|                   | Control*           | 04.01.16 14:32  | 05.01.16 14:33 |
|                   | High-F0*           | 05.01.16 14:33  | 06.01.16 15:20 |
|                   | Low-F0*            | 06.01.16 15:20  | 07.01.16 15:30 |
|                   | Control*           | 10.01.16 12:55  | 11.01.16 13:27 |
|                   | Low-F0*            | 11.01.16 13:27  | 12.01.16 14:00 |
|                   | Control*           | 13.01.16 11:37  | 14.01.16 10:00 |
|                   | Low-F0*            | 17.01.16 13:44  | 18.01.16 13:17 |
|                   | Control*           | 18.01.16 13:17  | 19.01.16 13:15 |
|                   | Low-F0*            | 19.01.16 13:15  | 20.01.16 13:20 |
|                   | Control*           | 20.01.16 13:20  | 21.01.16 14:00 |
|                   | Low-F0*            | 24.01.16 10:40  | 25.01.16 11:00 |
|                   | Control*           | 25.01.16 11:00  | 26.01.16 11:13 |
|                   | Low-F0*            | 26.01.16 11:13  | 27.01.16 11:34 |
|                   | Control*           | 27.01.16 11:34  | 28.01.16 10:00 |
|                   | Low-F0*            | 31.01.16 10:25  | 01.02.16 11:20 |
|                   | High-F0*           | 01.02.16 11:20  | 02.02.16 11:22 |
|                   | Control            | 02.02.16 11:22  | 03.02.16 11:22 |
|                   | Low-F0             | 03.02.16 11:22  | 04.02.16 11:25 |
|                   | High-F0            | 04.02.16 11:25  | 05.02.16 11:50 |
| 2                 | High-F0            | 01.05.16 11:35  | 04.05.16 10:00 |
|                   | Low-F0             | 05.05.16 09:40  | 10.05.16 10:41 |
|                   | Control            | 10.05.16 10:41  | 13.05.16 11:15 |
|                   | High-F0            | 13.05.16 11:15  | 16.05.16 09:51 |
|                   | Low-F0             | 16.05.16 09:51  | 19.05.16 10:24 |
|                   | Control            | 19.05.16 10:24  | 22.05.16 16:00 |
|                   | High-F0            | 29.05.16 11:00  | 02.06.16 11:00 |
| 3                 | High-F0            | 01.07.16 09:55  | 07.07.16 10:53 |
|                   | Low-F0             | 07.07.16 10:53  | 10.07.16 10:24 |
|                   | Control            | 10.07.16 10:24  | 13.07.16 09:55 |
|                   | High-F0            | 13.07.16 09:55  | 17.07.16 12:06 |
|                   | Low-F0             | 17.07.16 12:06  | 20.07.16 14:42 |
| Control           | 20.07.16 14:42     | 25.07.16 10:00  |                |

---

|   |         |                |                |
|---|---------|----------------|----------------|
| 4 | High-F0 | 01.09.16 09:27 | 05.09.16 09:17 |
|   | Low-F0  | 05.09.16 09:17 | 08.09.16 09:44 |
|   | Control | 08.09.16 09:44 | 11.09.16 09:15 |
|   | High-F0 | 11.09.16 09:15 | 15.09.16 09:30 |
|   | Low-F0  | 15.09.16 09:30 | 18.09.16 09:37 |
|   | Control | 18.09.16 09:37 | 21.09.16 11:23 |
|   | High-F0 | 21.09.16 11:23 | 24.09.16 23:00 |

---

\* Recording rotations with only 3 pups at a time, each rotation with a different individual composition
